# Supplementary material for: BET, SRC, and BCL2 family inhibitors are synergistic drug combinations with PARP inhibitors in ovarian cancer
Source: PubMed Central journal article supplement — eBioMedicine. 2020 Sep 11;60:102988. doi: 10.1016/j.ebiom.2020.102988 (PMC7494677; doi:10.1016/j.ebiom.2020.102988), 2020-09-11
Supplement: mmc1.pdf [file mmc1.pdf]

# Supplementary Figures & Tables

**BET, SRC, and BCL2 family inhibitors are synergistic drug combinations with PARP inhibitors in ovarian cancer**

**Authors:**

Goldie Y. L. Lui, Reid Shaw, Franz X. Schaub, Isabella N. Stork, Kay E. Gurley, Caroline Bridgwater, Robert L. Diaz, Rachele Rosati, Hallie A. Swan, Tan A. Ince, Thomas C. Harding, Vijayakrishna K. Gadi, Barbara A. Goff, Christopher J. Kemp, Elizabeth M. Swisher, Carla Grandori

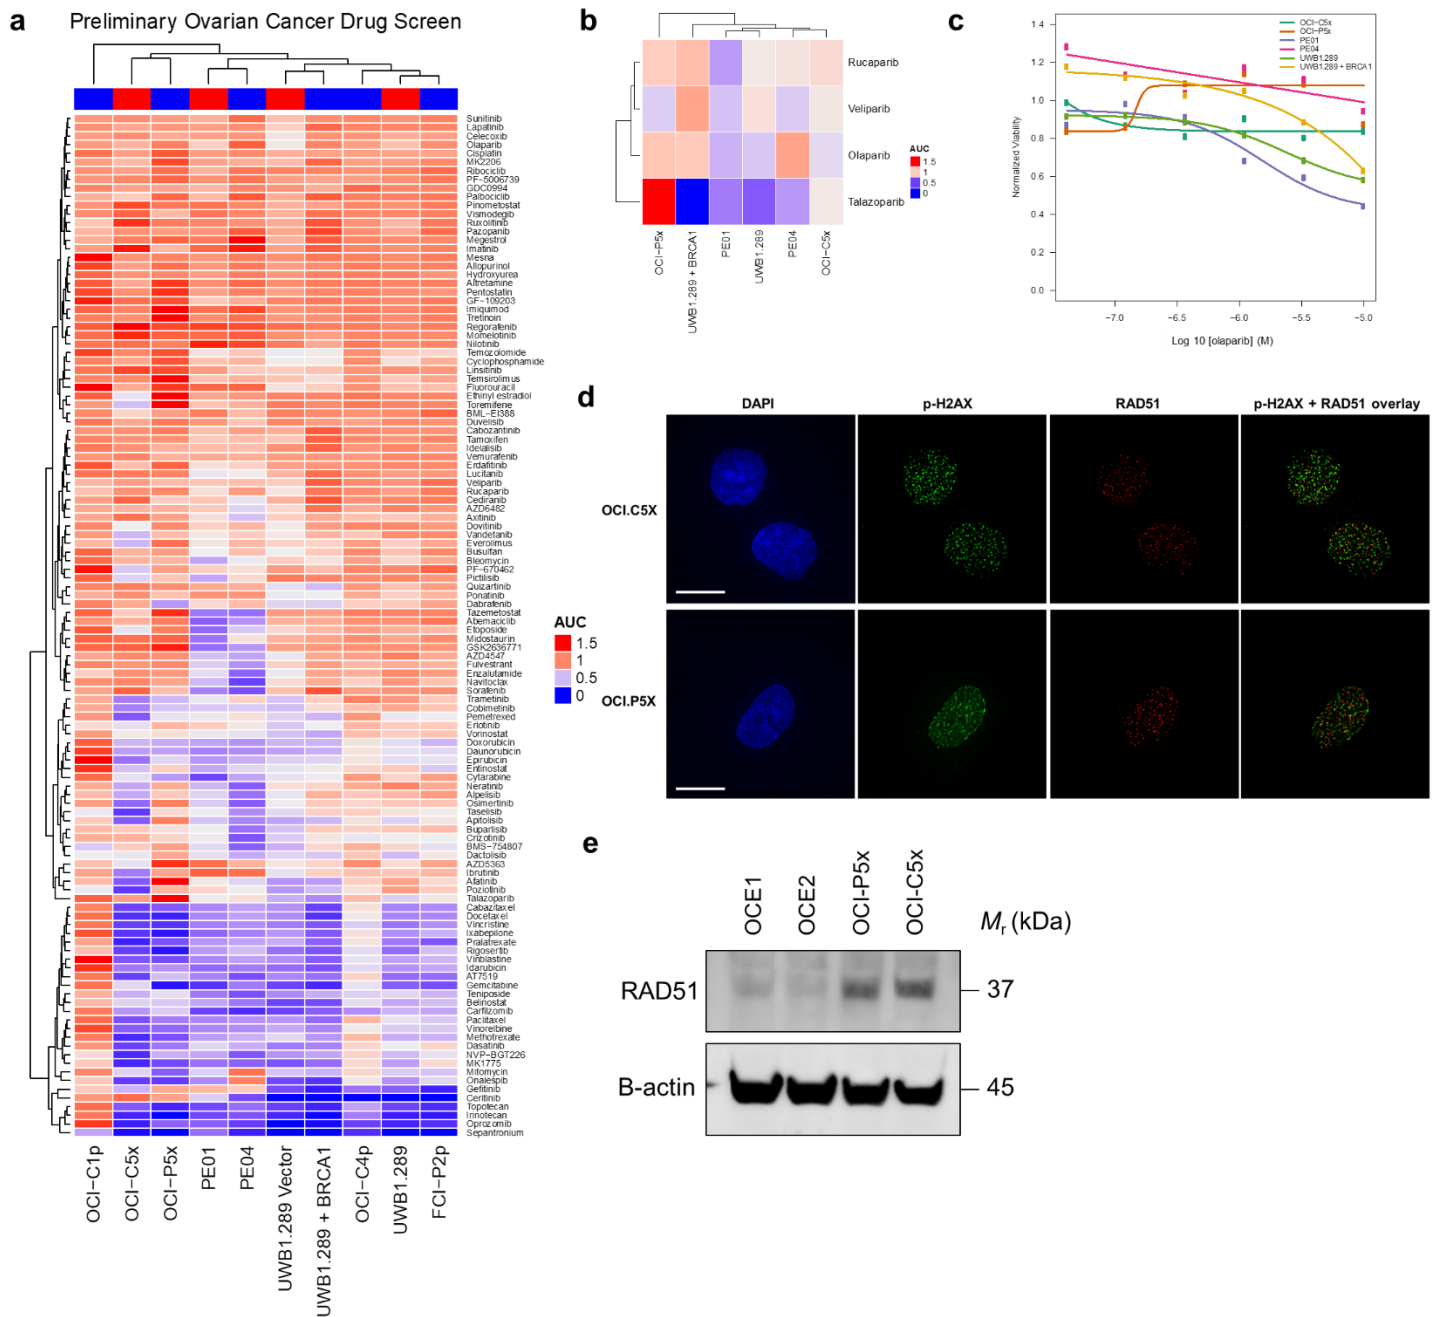

**Supplementary Figure 1. (a)** Preliminary drug screen of PDCs and cell lines to assess response to a panel of oncology-focused compounds. **(b)** Hierarchical clustering to PARP inhibitors. **(c)** The response to PARP inhibition for OCI-P5x and OCI-C5x is more similar to that of known BRCA1/2 reverted or restored cell lines (UWB1.289+BRCA1, PE04) than those cell lines that are PARPi sensitive with deleterious BRCA1/2 mutations (UWB1.289, PE01). **(d)** Representative images of immunofluorescence staining for RAD51 and p-HisH2AX in OCI-C5x and OCI-P5x cells following irradiation (10Gy). Cells were fixed and stained 4h post-irradiation. Scale bar = 5  $\mu$ m. **(e)** Basal levels of RAD51 protein expression in OCE1, OCE2, OCI-P5x, and OCI-C5x cells.

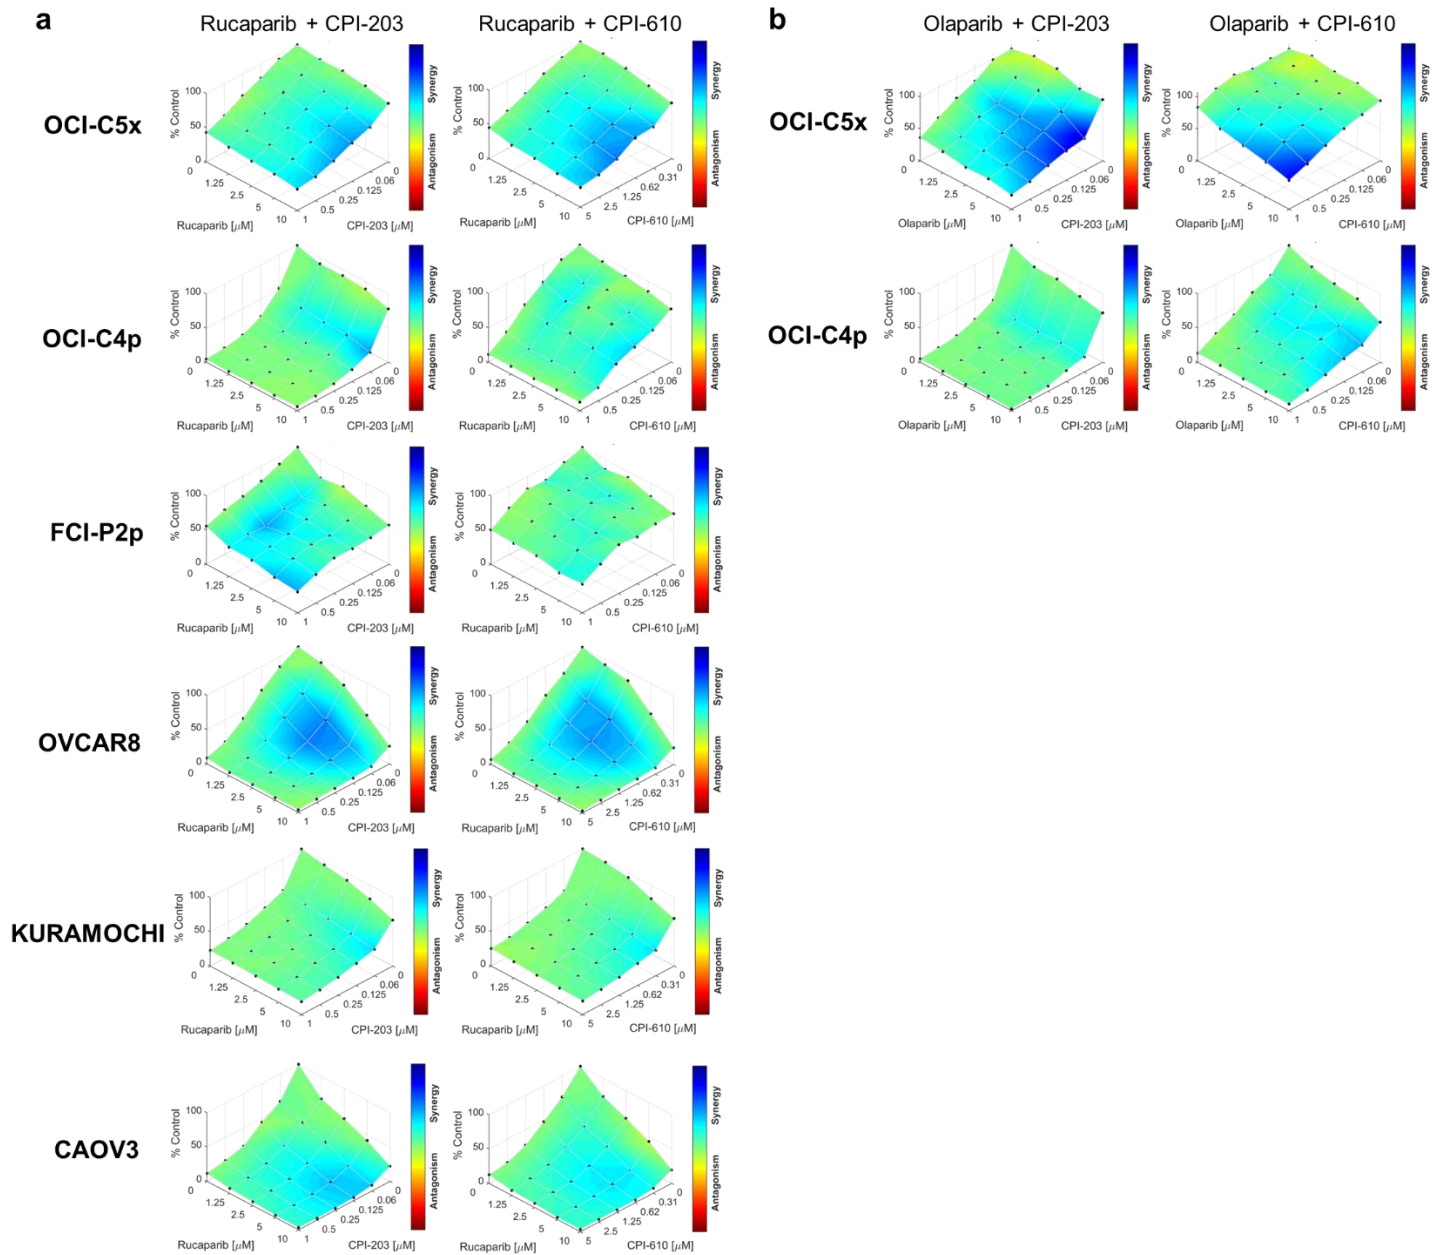

**Supplementary Figure 2. PARPi (rucaparib, olaparib) and BETi (CPI-203, CPI-610) combinations are synergistic in a panel of ovarian PDCs and cell lines. (a) Dose-response plots of rucaparib in combination with CPI-203 or CPI-610 demonstrating synergistic drug combination effects in OCI-C5x, OCI-C4p, FCI-P2p, OVCAR8, KURAMOCHI, and CAOV3 cells. (b) Dose-response plots of olaparib in combination with CPI-203 or CPI-610 demonstrating synergistic drug combination effects in OCI-C5x and OCI-C4p cells.**

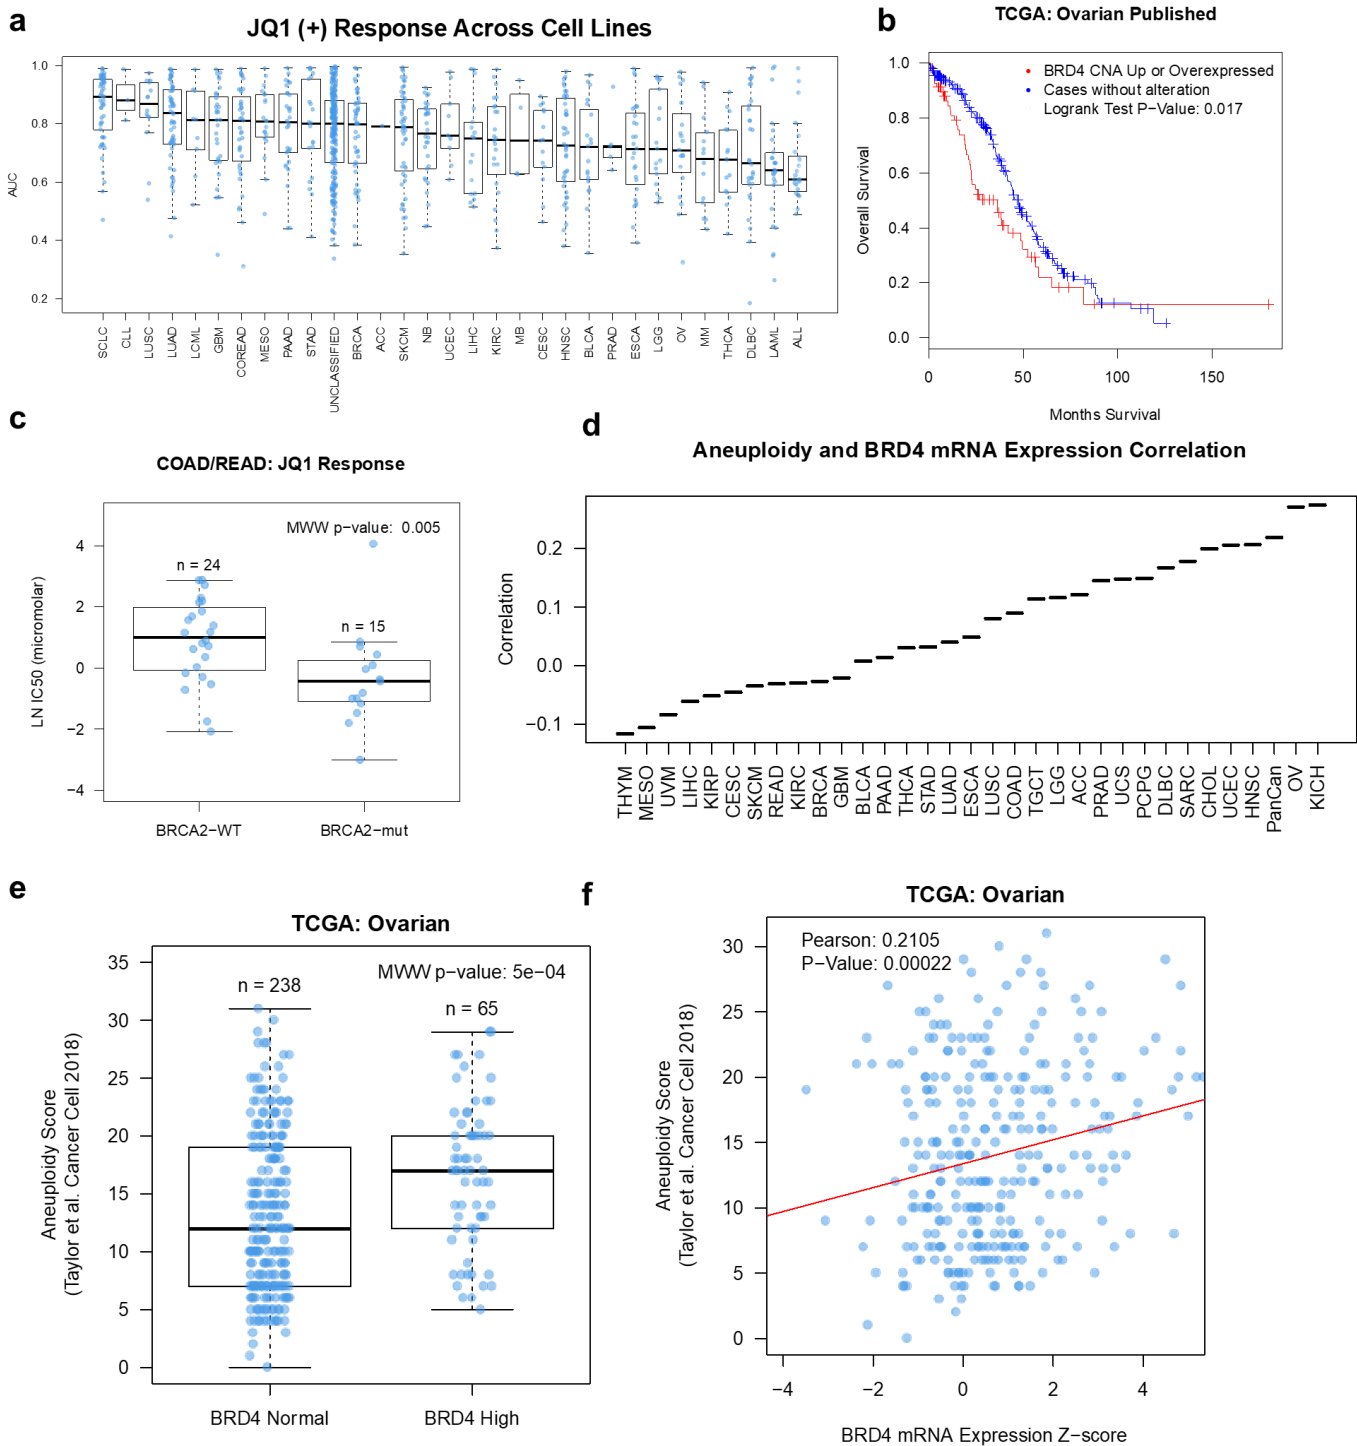

**Supplementary Figure 3. (a)** Ovarian cancer cell lines (OV) are the sixth most sensitive cell line type to JQ1 within the Genomics of Drug Sensitivity in Cancer (GDSC) dataset. **(b)** BRD4 overexpressed or copy number amplified HGSOC have a significantly decreased progression free survival than cases without BRD4 alteration. **(c)** BRCA1/2 mutated colorectal cancer cell lines are significantly more sensitive to JQ1 inhibition than BRCA1/2 wild type cell lines and in the GDSC project. **(d)** BRD4 mRNA expression level correlation with an aneuploidy score across individual cancer types and pan-cancer (Taylor et al. Cancer Cell 2018). **(e)** HGSOC with BRD4 overexpression or copy number amplification have a significantly higher rate of aneuploidy than those HGSOC which do not harbour such alterations. **(f)** Within the TCGA HGSOC dataset, BRD4 mRNA expression levels demonstrate a significant positive correlation with the aneuploidy score.

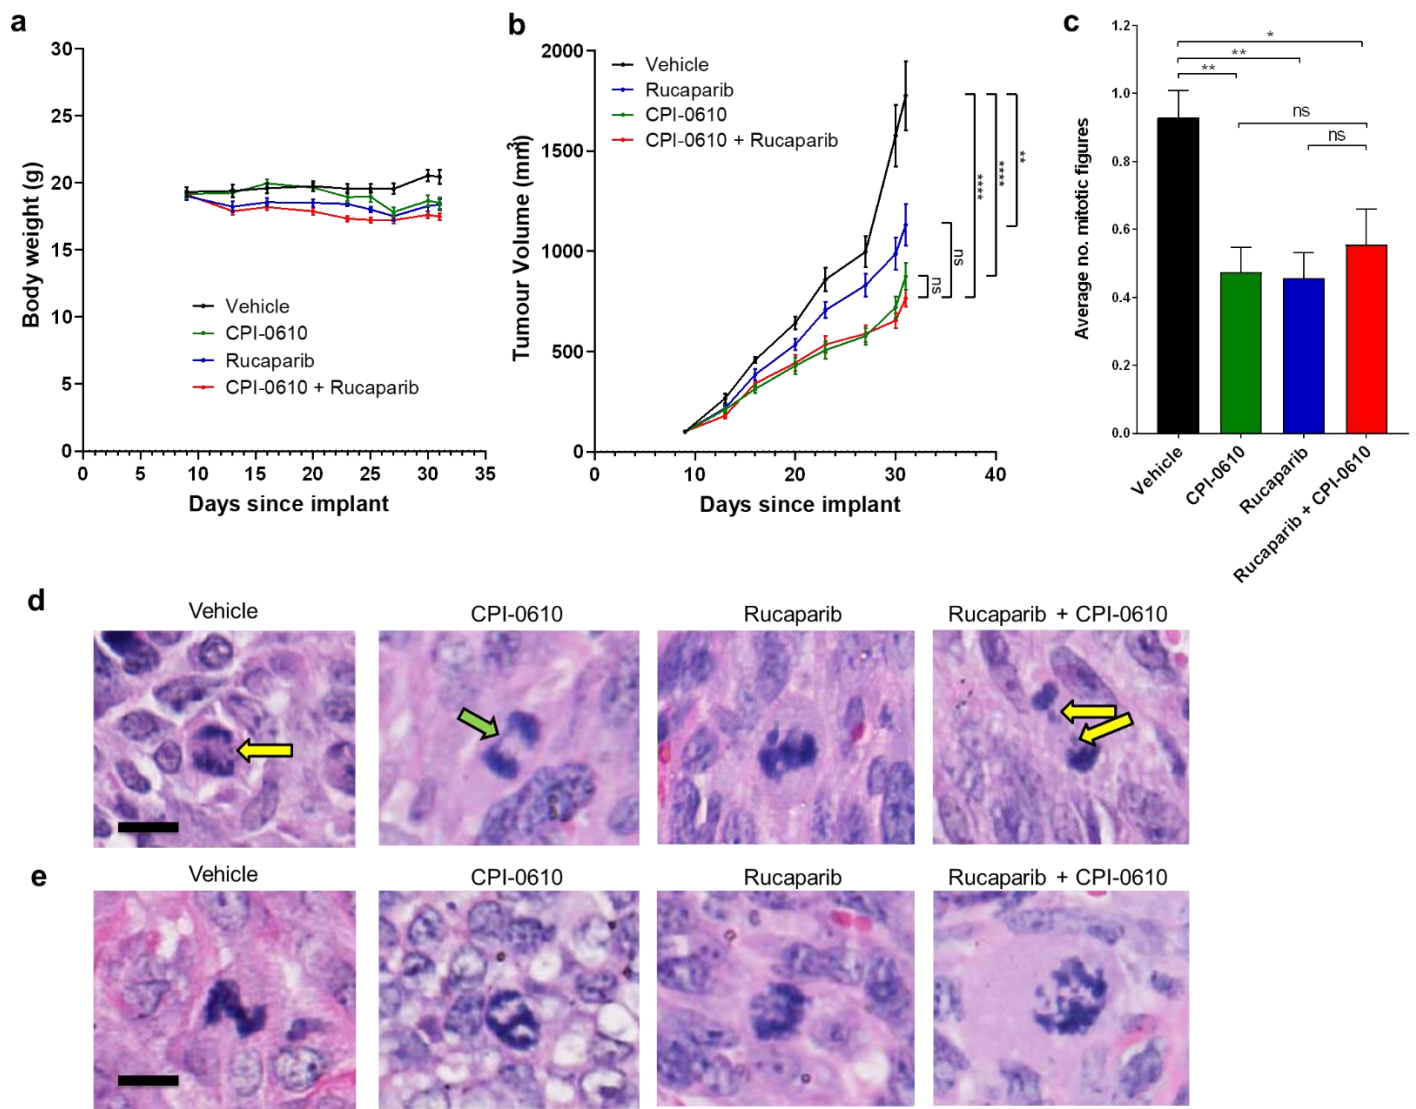

**Supplementary Figure 4. (a)** Body weight measurements from the OCI-P5x xenograft mouse study. Data is presented as mean  $\pm$  SEM. **(b)** Tumour volume measurements from the OCI-P5x xenograft mouse study. Data is presented as mean  $\pm$  SEM: \*\* $p < 0.01$ , \*\*\*\* $p < 0.0001$ , ns=not significant (one-way ANOVA followed by Tukey's test). **(c)** Mitotic index of each treatment group; calculated by counting number of mitotic figures at 40X magnification (10 fields per sample), then taking the average of the fields for each sample. Data is presented as mean  $\pm$  SEM: \* $p < 0.05$ , \*\* $p < 0.01$ , ns=not significant (one-way ANOVA followed by Tukey's test). **(d)** Representative images of mitotic figures in each treatment group. Common irregular mitotic events were observed such as trailing chromosomes (yellow arrows), and anaphase bridges (green arrow) **(e)** Representative images from each treatment group showing a high number of cells with aberrant mitotic shapes which are the hallmarks of mitotic catastrophe. Scale bar = 10  $\mu$ M.



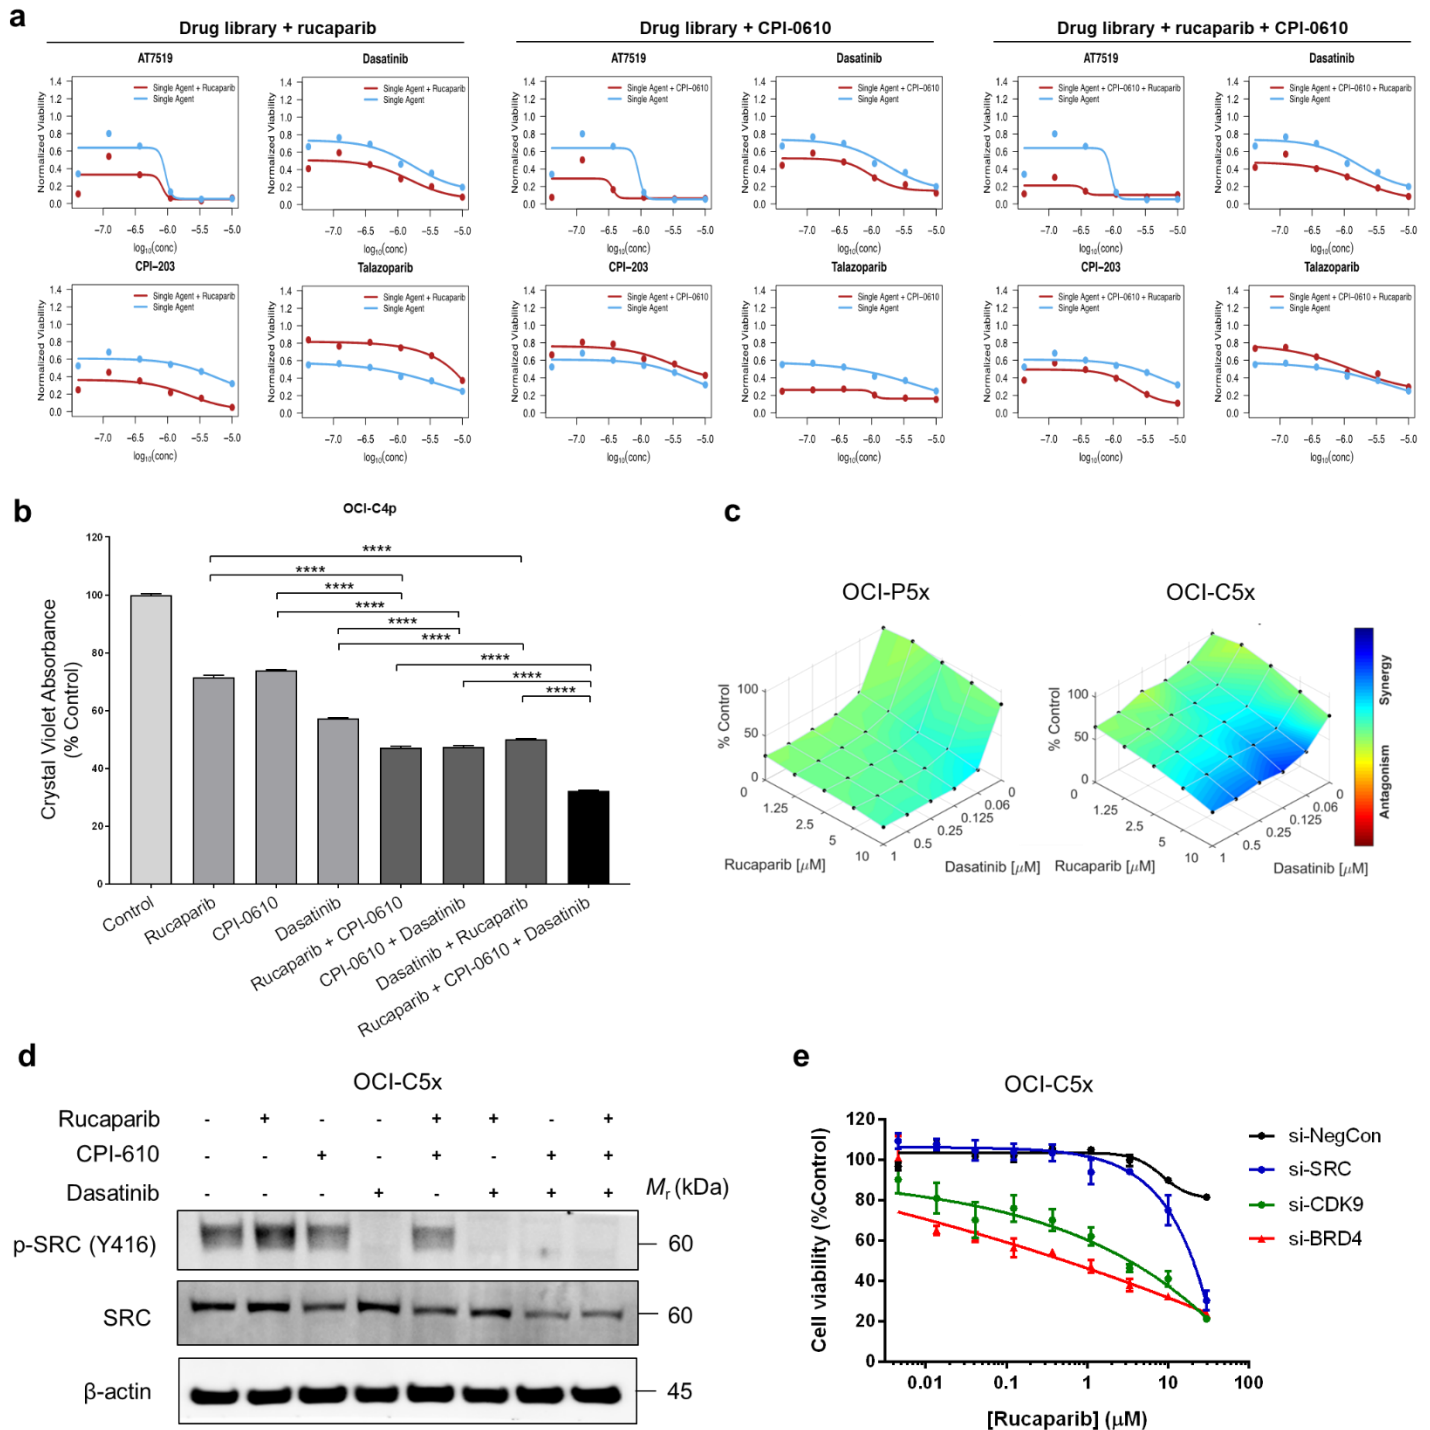

**Supplementary Figure 5. Additional drug screens identify rucaparib combinations with dasatinib and/or CPI-610 as effective in ovarian PDCs. (a)** Representative drug curves from the OCI-P5x combination screen utilizing a 131 clinically focused drug library in combination with rucaparib, CPI-610, or both rucaparib and CPI-610. **(b)** Clonogenic assays performed in OCI-C4p cells using rucaparib (10  $\mu$ M), CPI-0610 (0.5  $\mu$ M), and dasatinib (50 nM) as single agents, in double combinations, or in triple combination. Quantitation of crystal violet staining is representative of two independent experiments. Data is presented as mean  $\pm$  SEM: \*\*\*\* $p$ <0.0001, (one-way ANOVA followed by Tukey's test). **(c)** Dose-response plots of rucaparib in combination with dasatinib demonstrating synergistic drug combination effects in OCI-P5x and OCI-C5x cells. **(d)** Western blot analysis of phospho-SRC (Tyr 416) and SRC levels in response to treatment with rucaparib (10  $\mu$ M), CPI-0610 (3  $\mu$ M), and dasatinib (300 nM) for 48 h in OCI-C5x cells. **(e)** OCI-C5x cells were treated with siRNA specific to SRC, CDK9, or BRD4 for 48 h. Cells were subsequently treated with rucaparib for a further 6 days before cell viability was measured. Representative of 3 independent experiments, data is presented as mean  $\pm$  SEM.

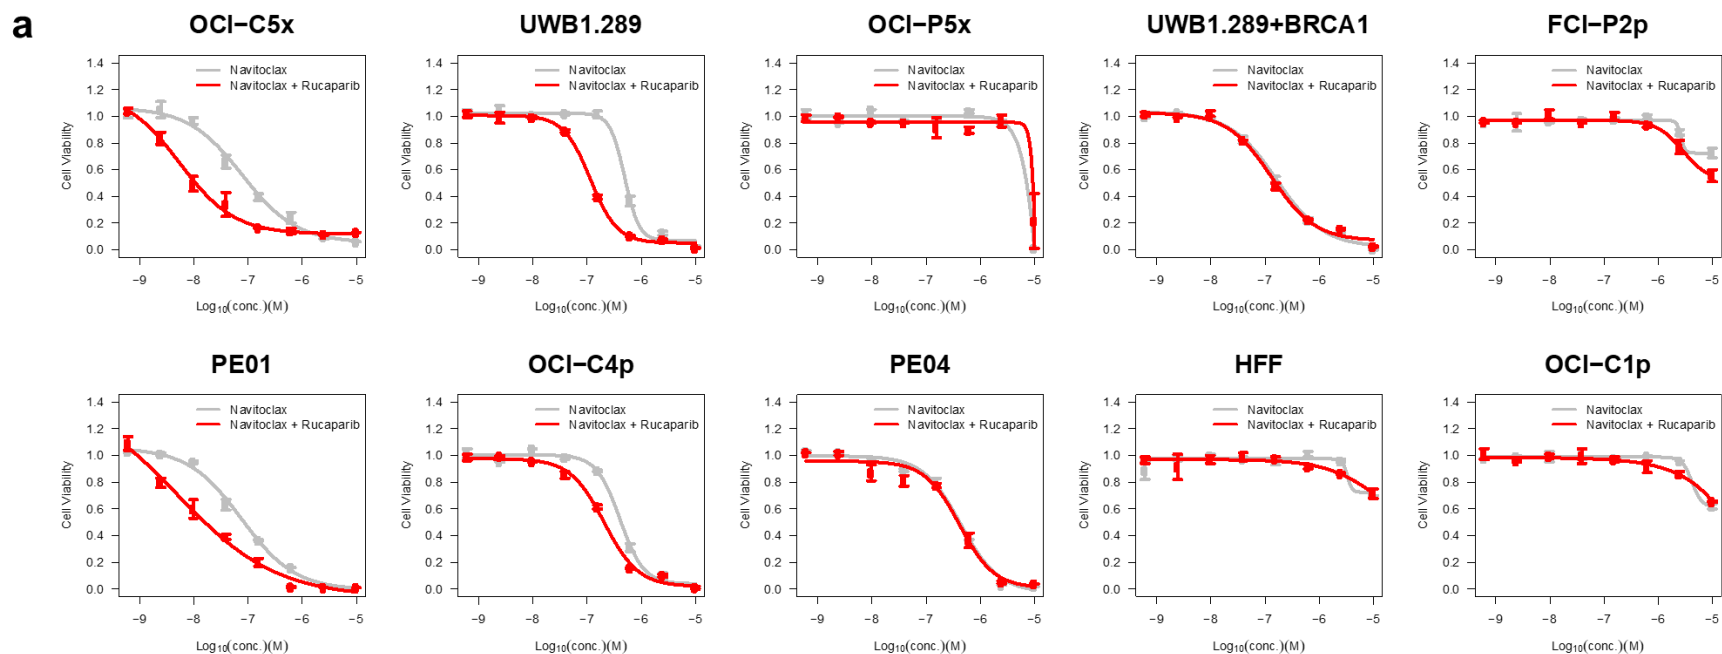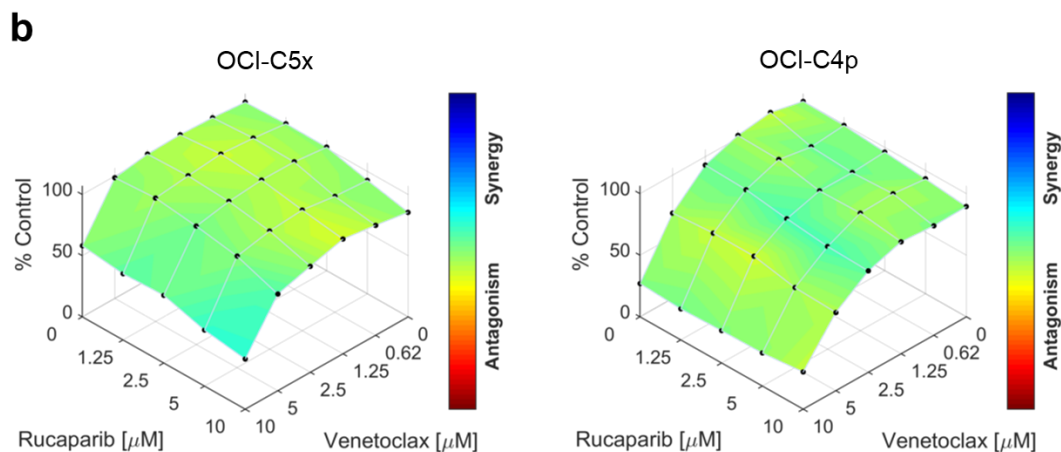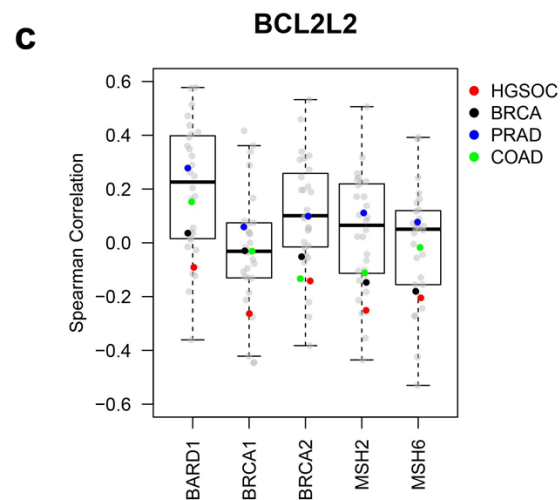

**Supplementary Figure 6. The rucaparib and navitoclax drug combination demonstrates more activity in cells with known BRCA or BARD1 mutations (OCI-C5x, OCI-C4p, UWB1.289, PE01). (a) Dose response curves of navitoclax as a single agent (grey) and with the addition of rucaparib (red) in 10 PDCs and cell lines. (b) Dose-response plots of rucaparib in combination with venetoclax demonstrating little synergy in OCI-C5x and OCI-C4p cells. (c) Correlation of *BCL2L2* expression with BRCA1/2, MSH2/6, and BARD1 expression in The Cancer Genome Atlas (TCGA): high grade serous ovarian carcinoma (HGSOC), breast invasive carcinoma (BRCA), prostate adenocarcinoma (PRAD), and colon adenocarcinoma (COAD).**

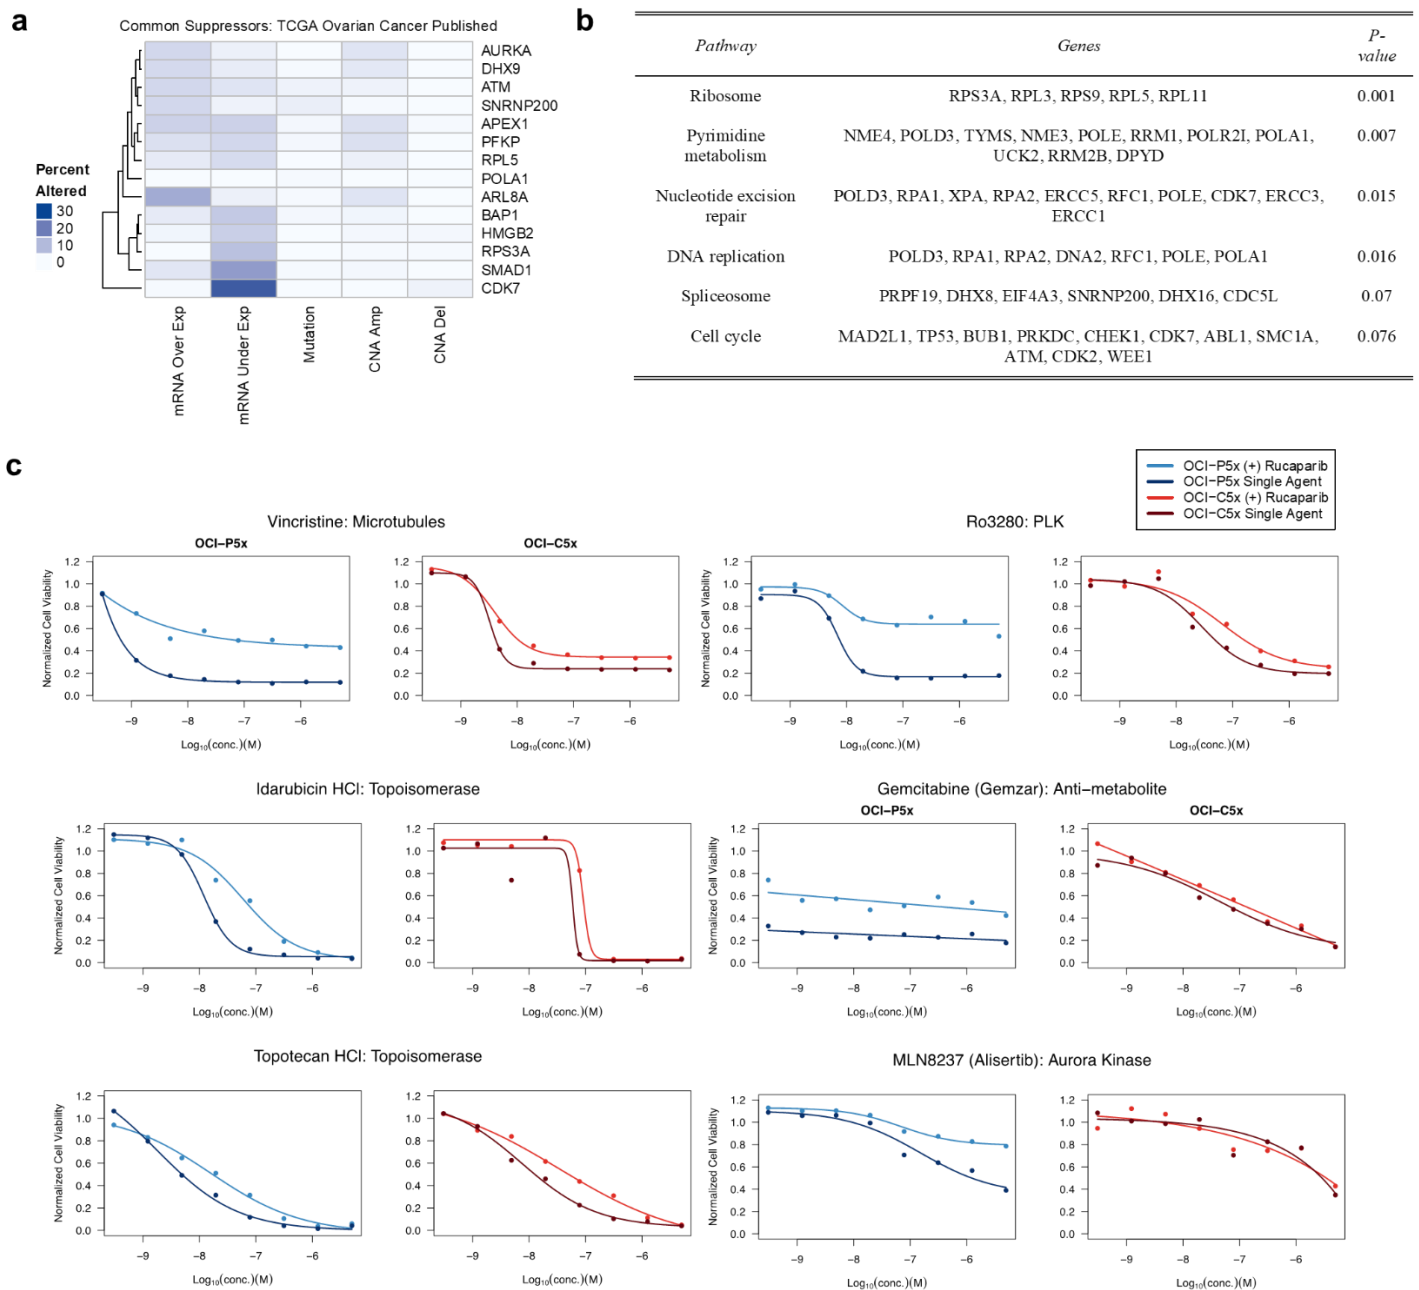

**Supplementary Figure 7. Rucaparib conditional drug screen identifies antagonistic drug combinations.** (a) TCGA ovarian cancer analysis of the common rucaparib suppressor genes indicates frequent underexpression of CDK7 and SMAD1. (b) Pathway analysis of all the unique rucaparib suppressor genes from the siRNA screen indicates an enrichment for those involved in cellular processes closely involved in cell division. (c) Rucaparib antagonistic drugs as identified by the high-throughput combinatorial drug screen ( $n = 395$ ). Drugs that commonly antagonize the effect of rucaparib target the mitotic spindle, microtubules, and DNA.



**Supplementary Table 1: List of mutations in ovarian patient derived cells from BROCA sequencing**

| Gene    | Location                              | AA substitution | cDNA substitution             | Zygoty | OCI.C5x | OCI.P5x | OCI.P7a | OCI.P9a1 | FCI.P2P | OCI.C1P | OCI.C4P |
|---------|---------------------------------------|-----------------|-------------------------------|--------|---------|---------|---------|----------|---------|---------|---------|
| BARD1   | CDS/frameshift insertion              | K205fs          | NM_000465:614dupA             | het    | 1       |         |         |          |         |         |         |
| BRCA1   | CDS/stopgain SNV                      | Q541X           | NM_007294:C1621T              | het    | 1       |         |         |          |         |         |         |
| MSH2    | CDS/frameshift deletion               | P472fs          | NM_000251:1414delC            | het    | 1       |         |         |          |         |         |         |
| MSH2    | CDS/stopgain SNV                      | R711X           | NM_000251:C2131T              | het    | 1       |         |         |          |         |         |         |
| PAXIP1  | CDS/frameshift deletion               | F100fs          | NM_007349:300delT             | het    | 1       |         |         |          |         |         |         |
| POLE    | CDS/frameshift deletion               | 1446_1446del    | NM_006231:4337_4338del        | het    | 1       |         |         |          |         |         |         |
| RBBP8   | CDS/frameshift deletion               | K355fs          | NM_002894:1063delA            | het    | 1       |         |         |          |         |         |         |
| RINT1   | CDS/frameshift deletion               | P246fs          | NM_021930:736delC             | het    | 1       |         |         |          |         |         |         |
| SMARCA4 | CDS/nonframeshift insertion           | P230delinsPGP   | NM_001128844:690_691insGGCCCT | het    | 1       |         |         |          |         |         |         |
| TP53BP1 | CDS/stopgain SNV                      | Q297X           | NM_001141980:C889T            | het    | 1       |         |         |          |         |         |         |
| POLQ    | splicing/splicing                     | -               | NM_199420:exon19:c.5774-1G>A  | het    |         | 1       |         |          |         |         |         |
| TP53    | CDS/nonsynonymous SNV                 | Y236N           | NM_000546:T706A               | hom    |         | 1       |         |          |         |         |         |
| BRCA1   | CDS/stopgain SNV                      | L974X           | NM_007294:T2921A              | het    |         |         | 1       |          |         |         |         |
| FANCL   | CDS/frameshift insertion/<br>splicing | T367fs          | NM_018062:1099_1100insATTA    | het    |         |         | 1       |          |         |         |         |
| BRCA1   | CDS/frameshift deletion               | E1000fs         | NM_007294:2999delA            | het    |         |         |         | 1        |         |         |         |
| BARD1   | CDS/frameshift deletion               | K205fs          | NM_000465:614delA             | het    |         |         |         |          |         |         | 1       |
| MSH6    | CDS/frameshift<br>insertion/splicing  | T1189fs         | NM_000179:3568dupT            | het    |         |         |         |          |         |         | 1       |
| TP53    | CDS/stopgain SNV                      | R342X           | NM_000546:C1024T              | hom    |         |         |         |          |         |         | 1       |
| PIK3CA  | CDS/nonsynonymous SNV                 | H1047L          | NM_006218:A3140T              | het    |         |         |         |          |         | 1       |         |
| TP53    | CDS/nonsynonymous SNV                 | R248Q           | NM_000546:G743A               | hom    |         |         |         |          | 1       |         |         |
| ERCC6   | CDS/stopgain SNV                      | Y1155X          | NM_000124:C3465A              | het    |         |         |         |          | 1       |         |         |

**Supplementary Table 2: Dosing regimen for OCI-P5x *in vivo* study**

| <b>Group</b> | <b>n</b> | <b>Tumour inoculum (s.c.) day 0</b>                          | <b>Treatment (when the mean tumour size reached 100 mm<sup>3</sup>)</b> | <b>Dose (mg/kg)</b> | <b>Dosing route</b> | <b>Treatment Schedule</b> |
|--------------|----------|--------------------------------------------------------------|-------------------------------------------------------------------------|---------------------|---------------------|---------------------------|
| 1            | 10       | 5 x 10 <sup>6</sup> /mouse in 0.1 ml PBS with Matrigel (1:1) | Vehicle                                                                 | 0                   | <i>p.o.</i>         | QDx23days                 |
| 2            | 10       |                                                              | CPI-0610                                                                | 60                  | <i>p.o.</i>         | QDx23days                 |
| 3            | 10       |                                                              | Rucaparib                                                               | 100                 | <i>p.o.</i>         | BIDx22days                |
| 4            | 10       |                                                              | CPI-0610                                                                | 60                  | <i>p.o.</i>         | QDx23days                 |
|              |          |                                                              | Rucaparib                                                               | 100                 | <i>p.o.</i>         | BIDx22days                |

| Supplementary Table 3: List of rucaparib sensitiser genes |          |          |          |          |        |          |          |         |
|-----------------------------------------------------------|----------|----------|----------|----------|--------|----------|----------|---------|
| OCI-P5x                                                   |          |          |          |          |        | OCI-C5x  |          |         |
| ASXL2                                                     | HNF1A    | NEK3     | PRDM15   | SFMBT1   | TRERF1 | AKT1     | HAUS7    | MYBL1   |
| BPTF                                                      | HNRNPAB  | NLGN2    | PRDM4    | SIRT2    | TRIM28 | ALDH18A1 | HCK      | MYO3B   |
| BRCA1                                                     | ING1     | NME3     | PRMT1    | SKIV2L   | TRIM33 | ALKBH3   | HIST2H4B | NEK10   |
| BRD4                                                      | ING3     | PALB2    | PRMT5    | SLC16A2  | TRIM68 | ALPK1    | HM13     | NRK     |
| C18orf37                                                  | JMJD2C   | PARP4    | PTTG1    | SLC1A2   | UBE2N  | AOF1     | HMG2N    | PAK4    |
| C1orf149                                                  | JMJD6    | PARP6    | PTTG2    | SLC22A11 | USP3   | AOF2     | INO80E   | PHF20L1 |
| CBX8                                                      | KDM5A    | PDE1B    | PWWP2B   | SMARCB1  | UTX    | BCL2L1   | JAK2     | PHKG2   |
| CLDN2                                                     | KIAA1718 | PDE1C    | PYGO1    | SMPDL3A  | UTY    | BRD4     | JMJD6    | PIK3CA  |
| CLDN3                                                     | LIG4     | PDE2A    | RABGGTA  | SS18L1   | WDR5   | C18orf37 | KMT2B    | PNKP    |
| CLOCK                                                     | LOC93349 | PDE3A    | RAI1     | SSRP1    | WNT4   | CD79A    | KTI12    | PRKCZ   |
| CNP                                                       | LRWD1    | PDE4A    | RBBP7    | SUPT16H  | YES1   | CHKA     | L3MBTL   | RASSF7  |
| DDX50                                                     | MAP2K3   | PDE7A    | RBL2     | SUPV3L1  | ZNHIT4 | CLK2     | LMTK3    | RIPK5   |
| DGKQ                                                      | MAP2K7   | PDE8A    | RCBTB1   | SUV39H1  | ZZZ3   | CTSD     | LY6E     | SCYL1   |
| DHX37                                                     | MAP3K12  | PDE8B    | RERE     | SUZ12    |        | DCAMKL2  | MACROD1  | STK17A  |
| DQX1                                                      | MBD5     | PELO     | REV1     | TADA1L   |        | DUT      | MAP3K12  | UBE2V2  |
| ECAT8                                                     | MBTD1    | PET117   | RIC8A    | TADA3    |        | EIF4A2   | MAPK15   |         |
| ELAC1                                                     | MED10    | PGGT1B   | RLF      | TAF1     |        | ERCC3    | MAPK3    |         |
| ERCC2                                                     | MED16    | PHF16    | RNF17    | TAF12    |        | ERCC6    | MBD4     |         |
| FBXO10                                                    | MED23    | PHF20L1  | RPH3A    | TAF1L    |        | ERN1     | MBD6     |         |
| FXR2                                                      | MED4     | PHF8     | RPS6KB1  | TAF5L    |        | EVI1     | MCCC1    |         |
| GDPD1                                                     | MED8     | PIAS2    | RUVBL1   | TAF7     |        | EZH1     | MED22    |         |
| GDPD2                                                     | MGC22014 | PIK3CB   | RUVBL2   | TARBP2   |        | FGF19    | MET      |         |
| GLRA2                                                     | MIER1    | PIK3CD   | RYR1     | TDP1     |        | FMR1     | MLL      |         |
| HDAC2                                                     | MIER3    | PLCB4    | S100A4   | TDRD6    |        | FRMPD4   | MLL5     |         |
| HIF1A                                                     | MLLT6    | PLCD1    | SAFB     | TGFB1    |        | FTO      | MORC1    |         |
| HIRA                                                      | MORC1    | PLCD4    | SATB2    | TGFB2    |        | GALK2    | MORF4L1  |         |
| HIST1H4C                                                  | MSX1     | PLCG2    | SBDSP1   | TGM3     |        | GCKR     | MPHOSPH8 |         |
| HIST2H4B                                                  | MTA1     | PMAIP1   | SBNO1    | TLE1     |        | GGCT     | MPP4     |         |
| HMG20A                                                    | MTA3     | POU5F1P4 | SCML2    | TLR7     |        | GPX1     | MSH2     |         |
| HMG20A                                                    | MTA3     | POU5F1P4 | SCML2    | TLR7     |        | GPX1     | MSH2     |         |
| HMG20A                                                    | MTA3     | POU5F1P4 | SCML2    | TLR7     |        | GPX1     | MSH2     |         |
| HMGN3                                                     | NDEL1    | PRDM1    | SERPINE2 | TNRC6B   |        | GRK4     | MVK      |         |

**Supplementary Table 4: List of rucaparib suppressor genes**

| OCI-P5x  |          |         |          | OCI-C5x |          |         |          |
|----------|----------|---------|----------|---------|----------|---------|----------|
| AATK     | CDK7     | MAP3K1  | RPL11    | ACTL6B  | CXXC5    | NUDT1   | SGK      |
| ABL1     | CHAF1B   | MAP3K5  | RPL5     | ACTR5   | DAPK3    | OARD1   | SMAD1    |
| ABL2     | CHKB     | MAP3K8  | RPS3A    | ADCK4   | DDX31    | PAF1    | SMARCAL1 |
| ACTR6    | CKM      | MARK2   | RPS6KA3  | AIFM2   | DHX35    | PCM1    | SMPD3    |
| ACVR1C   | CLK4     | MAST1   | RPS6KB1  | APEX1   | DHX9     | PDE4B   | SNRNP200 |
| ADCK2    | CRY2     | MAST2   | SBK1     | APOA2   | DICER1   | PFKP    | TESK2    |
| AIPL1    | CSNK1A1  | MET     | SETMAR   | ARL8A   | DNA2     | PHF3    | TF       |
| AK5      | CSNK1D   | MPP1    | SFPQ     | ATM     | EME2     | POLA1   | TNK2     |
| AKAP1    | CSNK1E   | MYLK2   | SMAD1    | ATP7A   | ERCC1    | POLD3   | TRIM24   |
| ALK      | DHX8     | NDC80   | SMC1A    | AURKA   | FANCM    | POLH    | TYMS     |
| ALPK2    | DHX9     | NDUFA10 | SMG1     | BAIAP2  | FOXA2    | POLQ    | TYRO3    |
| APEX1    | DMAP1    | NME3    | SNRNP200 | BAP1    | GRK1     | POLR2K  | UBE2N    |
| APEX2    | DPH3     | PFKM    | SPHK2    | BCL3    | HMGB2    | PRDM11  | UTY      |
| ARID1A   | DYRK2    | PFKP    | STK11    | BCOR    | IRAK3    | PRKAR1A | ZBTB7A   |
| ARL8A    | EIF4A3   | PHKG2   | STK39    | BMI1    | KCTD13   | PRMT10  |          |
| ATM      | EPHA4    | PIM1    | STK40    | BRPF3   | KDM5A    | PSMC2   |          |
| AURKA    | ERBB2    | PIP5K2A | TEK      | CBX5    | KIAA1447 | RIPK3   |          |
| AURKB    | EXT1     | PIP5K2C | TSSK1    | CBX7    | KPNA1    | RIPK4   |          |
| BAP1     | FGFR2    | POLA1   | UBR2     | CDC2L2  | KPNA3    | RPA1    |          |
| BLM      | FLJ23018 | PRKCE   | UCK2     | CDC5L   | LMTK2    | RPA2    |          |
| BMX      | FLT4     | PRKCI   | VRK2     | CDIPT   | MAD2L1   | RPIA    |          |
| BRWD1    | GCK      | PRKDC   | WEE1     | CDK2    | MAP3K14  | RPL3    |          |
| BUB1     | GK2      | PRKX    | WNK2     | CDK7    | MSH2     | RPL5    |          |
| CAMK1G   | HMGB2    | PTK6    | XAB2     | CENPV   | MUS81    | RPS3A   |          |
| CD79A    | HSPB8    | PTK9    | XRCC6    | CHEK1   | MYSM1    | RPS9    |          |
| CDC2L5   | IHPK3    | RAD51L3 |          | CHMP2A  | NADK     | RRP8    |          |
| CDC2L6   | KIF18A   | RAPGEF4 |          | CIT     | NAP1L5   | S100A6  |          |
| CDC42BPA | LATS2    | ROR1    |          | CLDN6   | NME4     | SBDS    |          |
